# Supplementary material for: Atmospheric evolution of environmentally persistent free radicals in rural North China Plain: insights into water solubility and effects on PM 2.5 oxidative potential
Source: Copernicus journal article supplement (doi:10.5194/egusphere-2024-1622), 2024-06-13
Supplement: Supplementary file 1 [file egusphere-2024-1622-supplement.pdf]

1 Supporting Information for

2 **Atmospheric evolution of environmentally persistent free radicals in**  
3 **rural North China Plain: insights into water solubility and effects on**  
4 **PM<sub>2.5</sub> oxidative potential**

5 Xu Yang<sup>1</sup>, Fobang Liu<sup>1,\*</sup>, Shuqi Yang<sup>1</sup>, Yuling Yang<sup>2</sup>, Yanan Wang<sup>1</sup>, JingJing Li<sup>2</sup>, Mingyu Zhao<sup>2</sup>, Zhao  
6 Wang<sup>1,3</sup>, Kai Wang<sup>2</sup>, Chi He<sup>1</sup>, Haijie Tong<sup>4,\*</sup>

7 <sup>1</sup>Department of Environmental Science and Engineering, School of Energy and Power Engineering, Xi'an Jiaotong University,  
8 Xi'an, Shaanxi 710049, China

9 <sup>2</sup>State Key Laboratory of Nutrient Use and Management, College of Resources and Environmental Sciences, National  
10 Academy of Agriculture Green Development, National Observation and Research Station of Agriculture Green Development  
11 (Quzhou, Hebei), China Agricultural University, Beijing 100193, China

12 <sup>3</sup>Shaanxi Provincial Land Engineering Construction Group Co., Ltd., Xi'an, Shaanxi 710075, China.

13 <sup>4</sup>Institute of Surface Science, Helmholtz-Zentrum Hereon, Max-Planck-Str. 1, Geesthacht 21502, Germany

14 \*Corresponding authors: Fobang Liu ([fobang.liu@xjtu.edu.cn](mailto:fobang.liu@xjtu.edu.cn)); Haijie Tong ([haijie.tong@hereon.de](mailto:haijie.tong@hereon.de))

15 Number of Pages: 30

16 Number of Texts: 2

17 Number of Figures: 10

18 Number of Tables: 10

19

20

## 21 **Text S1: Methods in the quantification of PM oxidative potential**

22 **OP<sup>DTT</sup>**: In the DTT depletion assay, the PM filters were first extracted using phosphate-buffered saline (PBS, pH = 7.4) at  
23 2400 rpm for 30 min. The extracts were then adjusted to a final concentration of 100 µg/mL for each sample to account for a  
24 non-linear effect. The PM extract was mixed with DTT (100 µM in PBS, Sigma-Aldrich) and incubated at 37 °C for 30 min.  
25 At 5 min intervals, 200 µL of the mixture was transferred to react with 5, 5-dithiobis (2-nitrobenzoic acid) (DTNB, 0.24 mM,  
26 Sigma-Aldrich) and tris buffer (6.45 mM with 20 mM ethylenediaminetetraacetic acid (EDTA)). The absorbance of the reaction  
27 mixture at 412 nm was measured using a microplate reader (SuPerMax 3000FA, Shanghai Flash Spectrum). To obtain the  
28 actual DTT consumption, the absorbance of matrix absorbance (PM and matrix) was subtracted from the final absorbance.  
29 Additionally, the DTT loss in the filter blank was also subtracted from the DTT loss in the samples. All the steps were  
30 performed in dark conditions.

31 The OP<sup>DTT</sup> is calculated based on the residual DTT concentration in the samples at different time intervals, i.e., calculated  
32 by the slope and intercept of the linear regression of the measured absorbance against time (Fang et al., 2015). Note that both  
33 total OP (Total-OP) and water-soluble OP (WS-OP<sup>DTT</sup>) were determined in this work. For Total-OP<sup>DTT</sup> determination,  
34 unfiltered PM extracts with filter punches left in the extracts were directly mixed with DTT. For WS-OP<sup>DTT</sup> determination, the  
35 extract was filtered through a 0.22 µm PTFE syringe filter before being mixed with DTT. The OP contribution from water-  
36 insoluble PM components (WIS-OP<sup>DTT</sup>) was considered as the difference between Total-OP<sup>DTT</sup> and WS-OP<sup>DTT</sup>

37 **OP<sup>•OH</sup>**: In the •OH production assay, a fluorescence-based method was used to measure •OH generated by PM. The same  
38 extraction method as for the OP measurement was used and a final concentration of PM extract was obtained. Then, 10 mM  
39 terephthalate (TPT, Thermo Scientific) and 200 µM ascorbic acid (Sigma-Aldrich) in PBS were added into the PM extract and  
40 incubated at 37 °C for 120 min. The added TPT reacted with the generated •OH to form stable and strongly fluorescent

41 hydroxyterephthalic acid (2-OHTA). At specified time intervals (0, 30, 60, 70, 90, 120 min), 200  $\mu\text{L}$  of the mixture was  
42 transferred and mixed with 100  $\mu\text{L}$  of dimethyl sulfoxide (100 mM in PBS) to quench the  $\bullet\text{OH}$  formation (Son et al., 2015).  
43 The fluorescent product 2-OHTA was detected at an excitation/emission wavelength of 310/425 nm using a microplate reader  
44 (SuPerMax 3000FA, Shanghai Flash Spectrum).

45 The actual  $\bullet\text{OH}$  generation rate was determined by subtracting the possible fluorescence from PM and matrix from the  
46 final fluorescence. Moreover, the  $\bullet\text{OH}$  generation by the filter blank was also corrected. The  $\bullet\text{OH}$  generation rate was calculated  
47 based on the determined 2-OHTA concentration at different time intervals as the formation of 2-OHTA is proportional to the  
48 generation of  $\bullet\text{OH}$ . Calibration with 2-OHTA standard (TCI) at concentrations of 0, 2, 3, 4, 5, and 6  $\mu\text{M}$  was performed daily  
49 to quantify the formed 2-OHTA concentrations. The  $\bullet\text{OH}$  concentration was then calculated by the following equation (1):

$$50 \quad [\bullet\text{OH}] = [2\text{-OHTA}]/y_{2\text{-OHTA}}, \quad (1)$$

51 where  $[2\text{-OHTA}]$  is the measured concentration of 2-OHTA,  $y_{2\text{-OHTA}}$  is the molar yield of 2-OHTA from the reaction  
52 of  $\bullet\text{OH}$  with TPT in PBS, which is 0.35 at pH 7.2 (Li et al., 2019).

53 Similar to OP measurements, both the  $\bullet\text{OH}$  generation rate by total PM (Total-OP<sup>OH</sup>) and water-soluble PM components  
54 (WS-OP<sup>OH</sup>) were determined, and the same extraction method as for OP measurements was used. The  $\bullet\text{OH}$  generation from  
55 water-insoluble PM components (WIS-OP<sup>OH</sup>) was considered as the difference between Total-OP<sup>OH</sup> and WS-OP<sup>OH</sup>.

56

## **Text S2: Discussion of OP<sub>v</sub> and OP<sub>m</sub> in this work and the literature**

Table S3 summarizes the OP<sub>v</sub> and OP<sub>m</sub> of PM determined by the DTT assay in this work and the literature. Overall, the OP<sub>v</sub> and OP<sub>m</sub> in this work are within the range of those previously reported in North China Plain (NCP). (Liu et al., 2018) Compared with other studies in China, the OP<sub>v</sub> for this work was found to be lower than Beijing (Lu et al., 2014), Guangzhou (Zhang Man-Man et al., 2019), but higher than Xi'an (Wang et al., 2020b), Shanghai (Lyu et al., 2018), and Nanjing (Ma et al., 2021). In addition, for this study the OP<sub>m</sub> was lower than in other regions except Xi'an and Guangzhou, and these results suggest that there is a significant spatial variation in OP<sup>DTT</sup> in Chinese cities.

Comparison with OP from several locations around the globe found that OP<sub>v</sub> and OP<sub>m</sub> measured in this work were higher than in Europe and the United States (Chirizzi et al., 2017; Gao et al., 2017; Clemente et al., 2023). but lower than in India and Thailand (Puthussery et al., 2020; Wang et al., 2020a). This may be attributed to the fact that India and Thailand are densely populated and heavily polluted with PM, whereas the air in Europe and the United States is relatively clean. It should be noted that the measured OP<sup>DTT</sup> varied depending on the extraction method (extraction solvent and extraction time) and filtration matrix (quartz, polytetrafluoroethylene, or mixed cellulose ester), and the OP<sup>DTT</sup> showed a bimodal distribution due to the variation in particle size also, which may be attributed to the particle size distribution characteristics of carbonaceous, metals.

Table S4 summarizes the OP<sub>v</sub> and OP<sub>m</sub> of PM quantified by •OH in this work and in the literature. Overall, the OP<sup>•OH</sup> measured in this study is lower but in the same order of magnitude when compared to the OP<sup>•OH</sup> of Beijing and Wangdu in China (Li et al., 2019). It is worth noting that Beijing, Wangdu, and this study were conducted in the North China Plain, but there were significant differences between the three, indicating that there are obvious spatial differences in OP<sup>•OH</sup> in the North China Plain, which may be due to the different pollution sources in different places. Meanwhile, the OP<sub>m</sub> results in this study are only higher than those of Pakistan in the United States when compared to foreign countries, suggesting that the study area contains less redox material per unit mass of PM, which may be related to the fact that the study area is rural and there are no obvious sources of pollution emissions in the surrounding area.

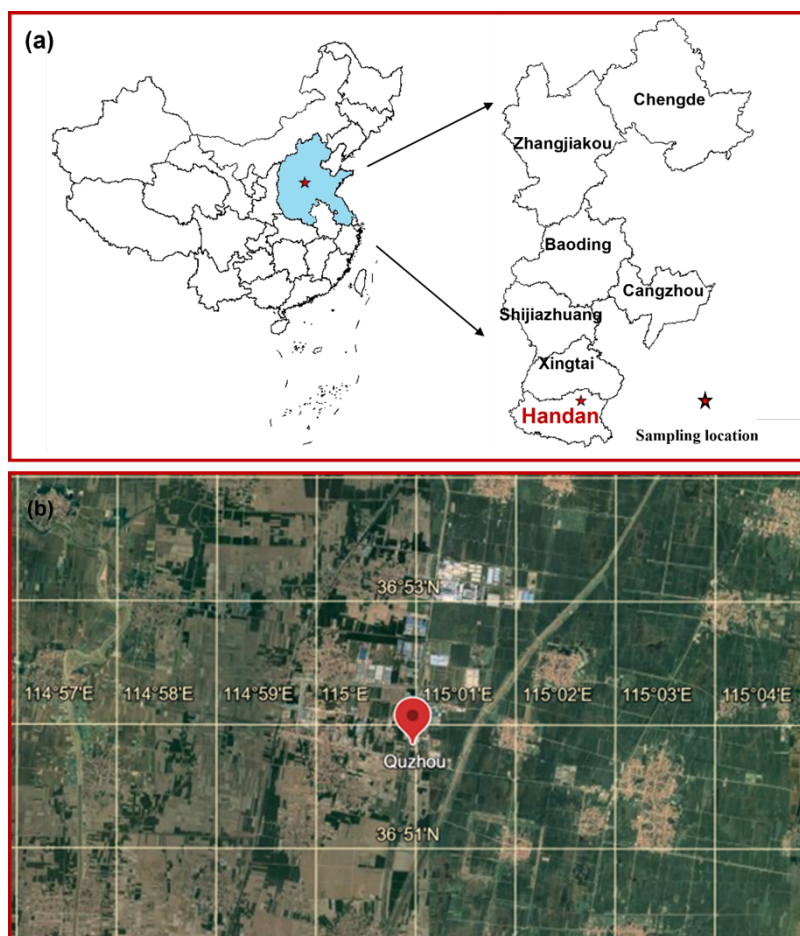

**Figure S1.** The location of the sampling site. (a) The Quzhou County site (the red star) in the North China Plain; (b) Specific location of the sampling site (from © Google Maps).

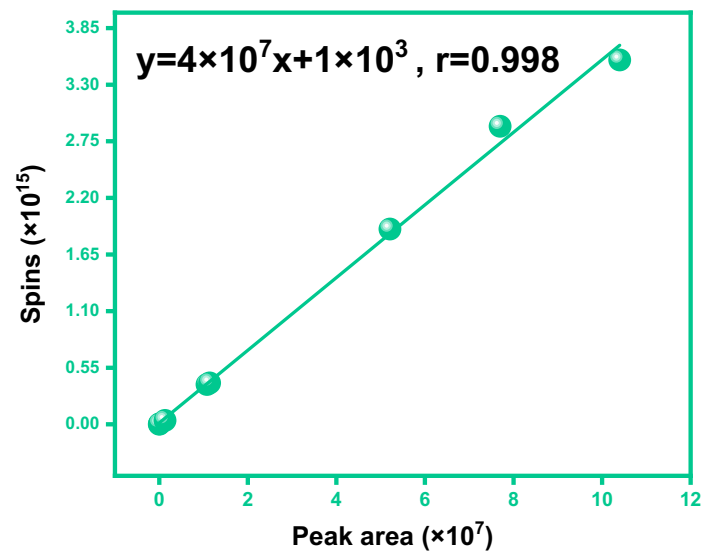

**Figure S2.** Calibration curve determined by peak area and spins of 4-hydroxy-2,2,6,6-tetramethylpiperidin-1-oxyl (TEMPOL).

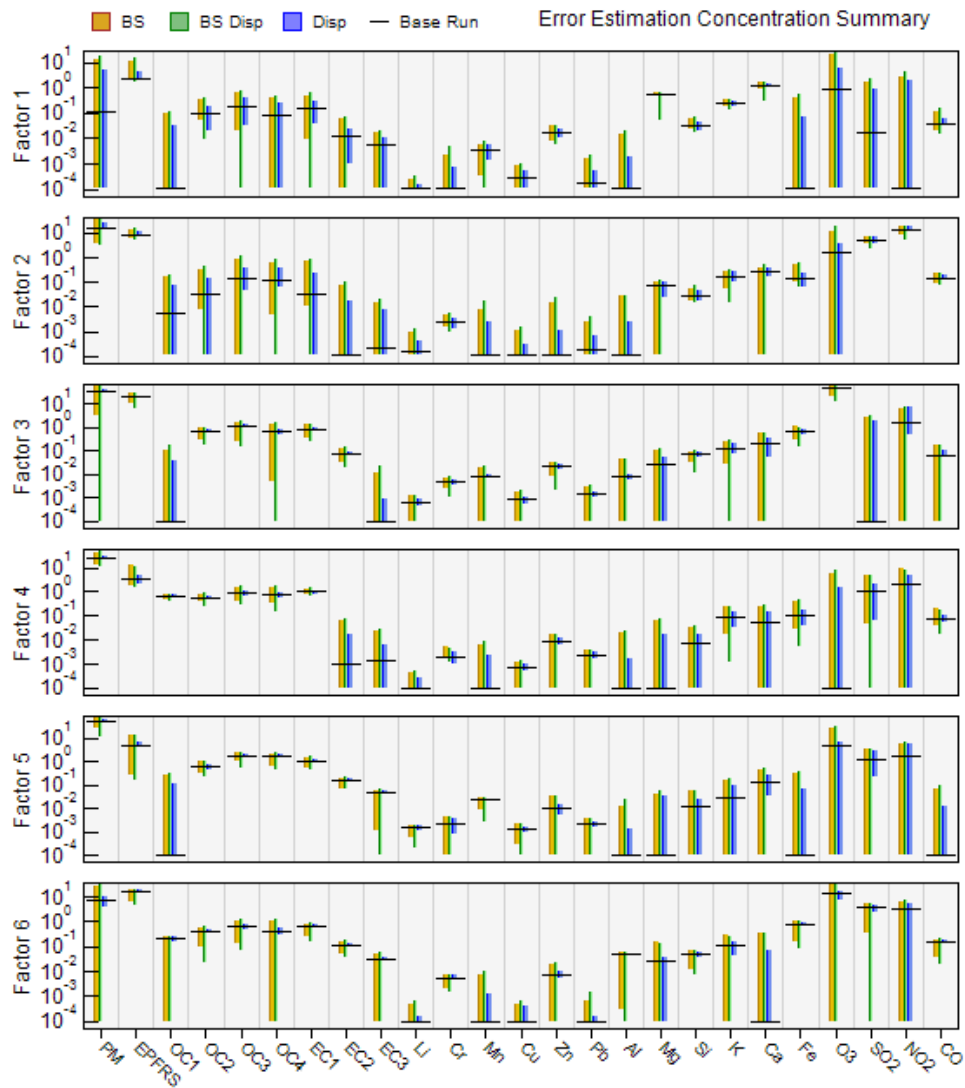

**Figure S3.** Summary of base run and error estimates as outputted by the PMF analysis.

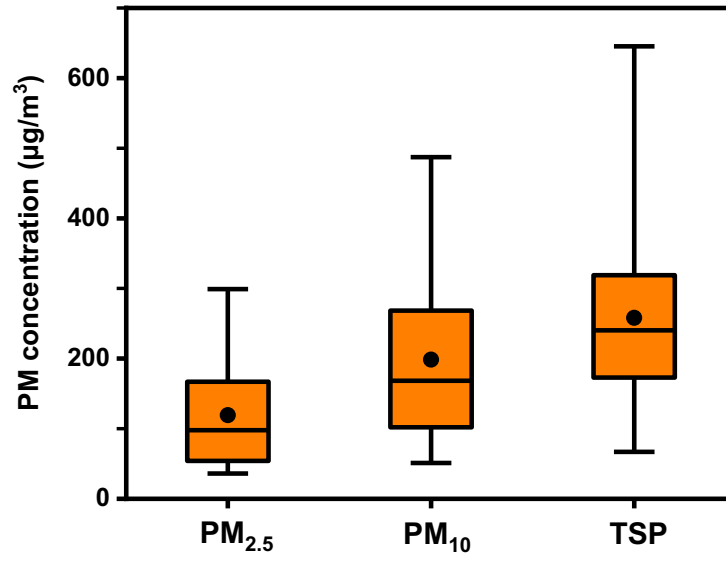

**Figure S4.** Box plots of PM concentrations in different particle sizes. The boxes represent the 25th percentile (lower edge), median (solid line), mean (solid dot), and 75th percentile (upper edge). The whiskers represent the minimum and maximum.



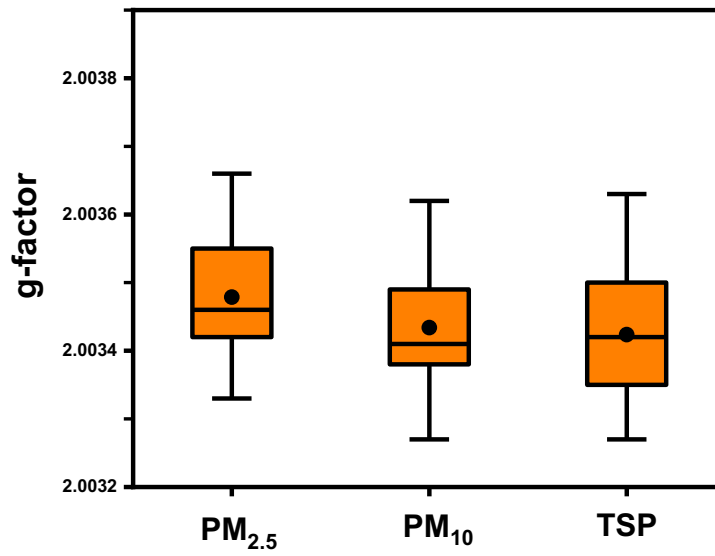

**Figure S5.** Box plots of variations of g-factor in different particle sizes. The boxes represent the 25<sup>th</sup> percentile (lower edge), median (solid line), mean (solid dot), and 75<sup>th</sup> percentile (upper edge). The whiskers represent the minimum and maximum.

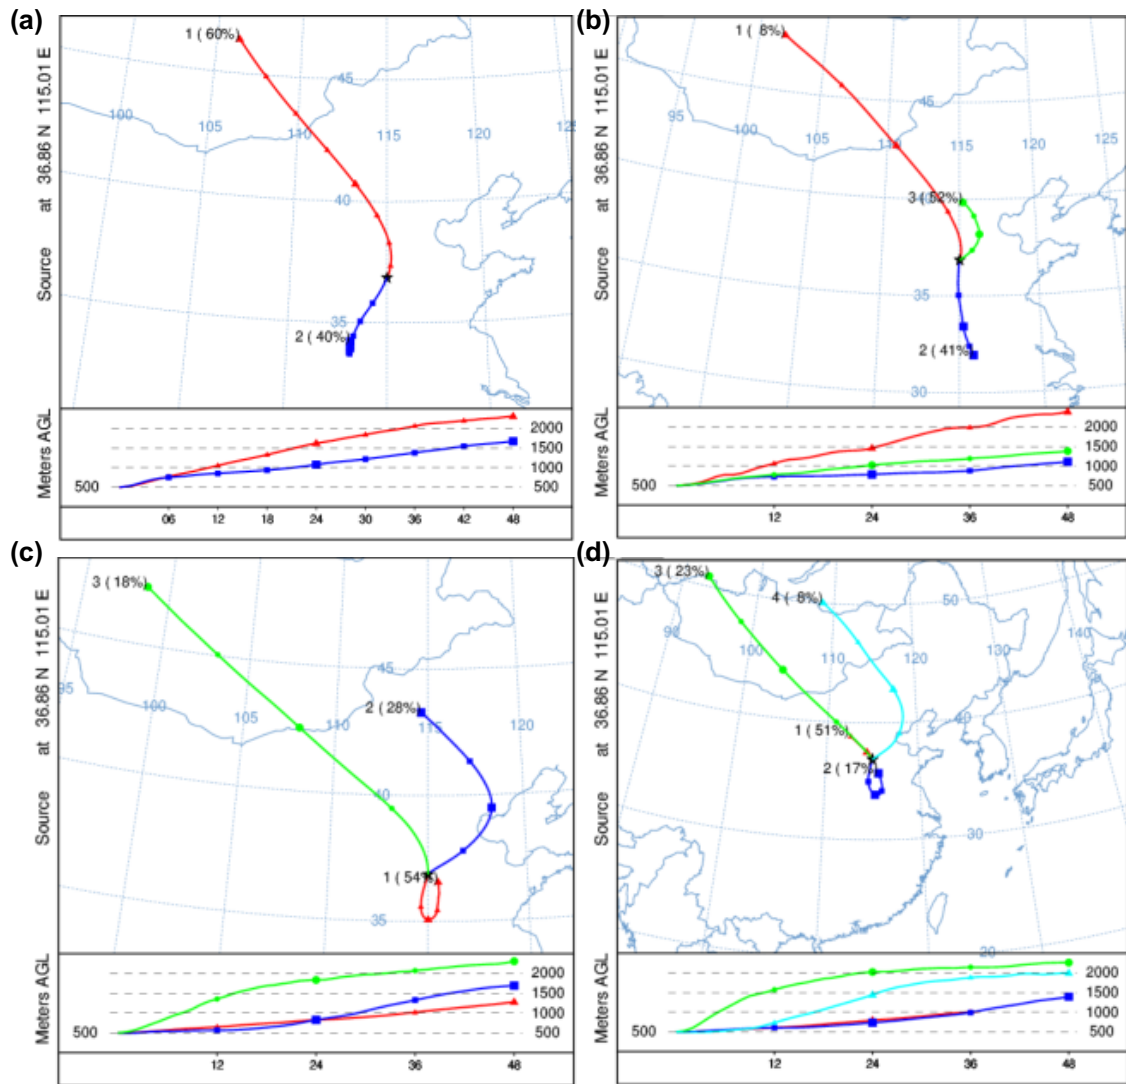

**Figure S6.** The 48-hr backward trajectory clusters by HYSPLIT for (a) spring; (b) summer; (c) autumn and (d) winter.

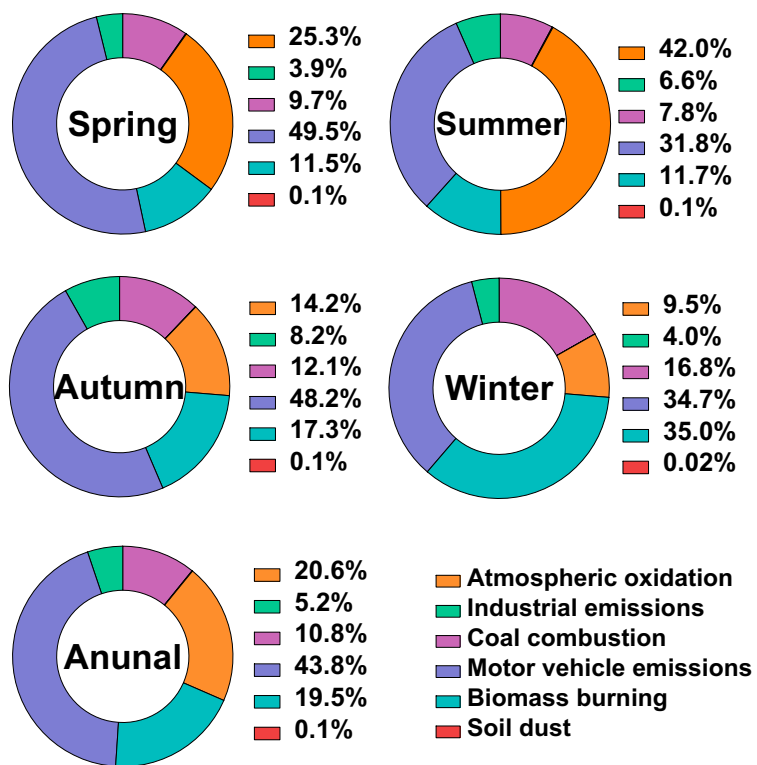

Figure S7. Seasonal and annual contributions of the six factors to PM.

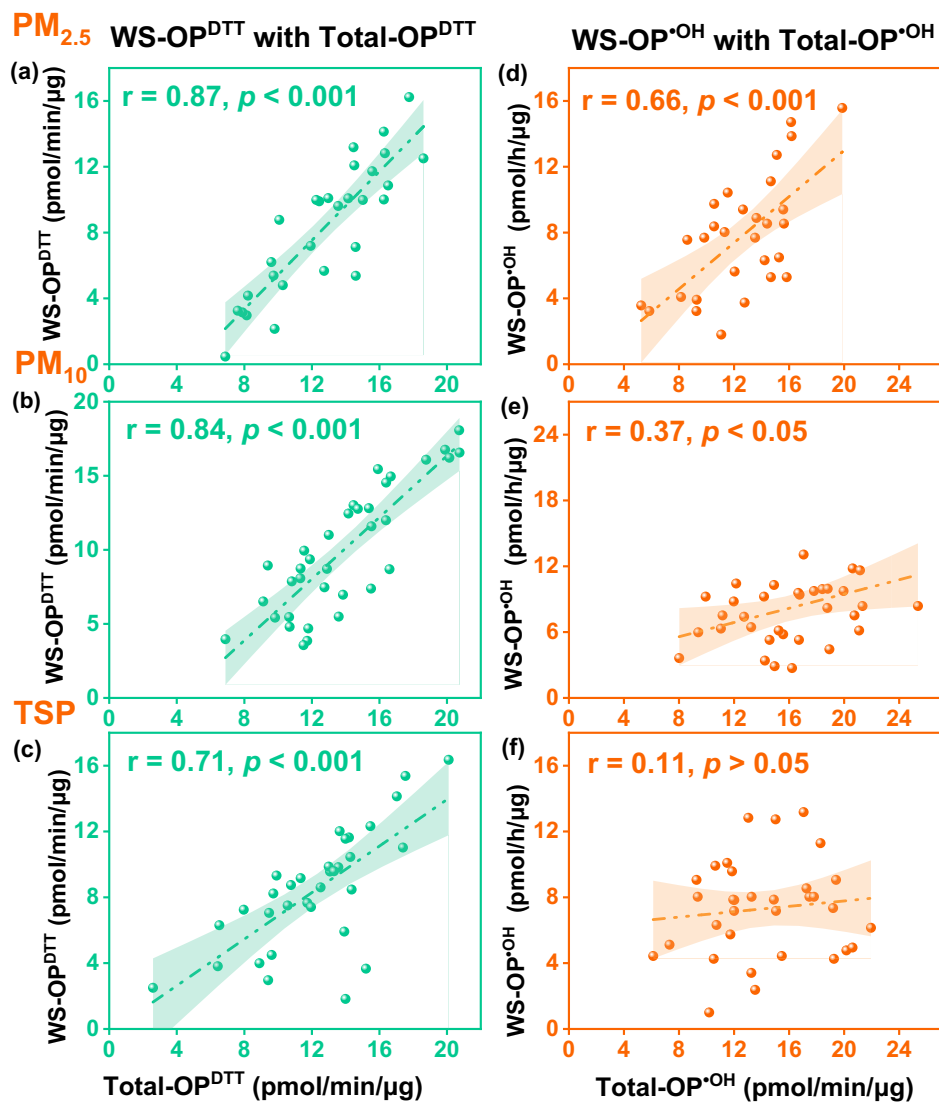

**Figure S8.** Correlations between WS-OP and Total-OP in different particle sizes; (a-c) Total-OP<sup>DTT</sup> with WS-OP<sup>DTT</sup>; (d-f) Total-OP<sup>OH</sup> with WS-OP<sup>OH</sup>. The Pearson correlation coefficients ( $r$ ) and associated  $p$  values are illustrated in the figure. The lines and shadow areas are linear regressions with their 95% confidence intervals.

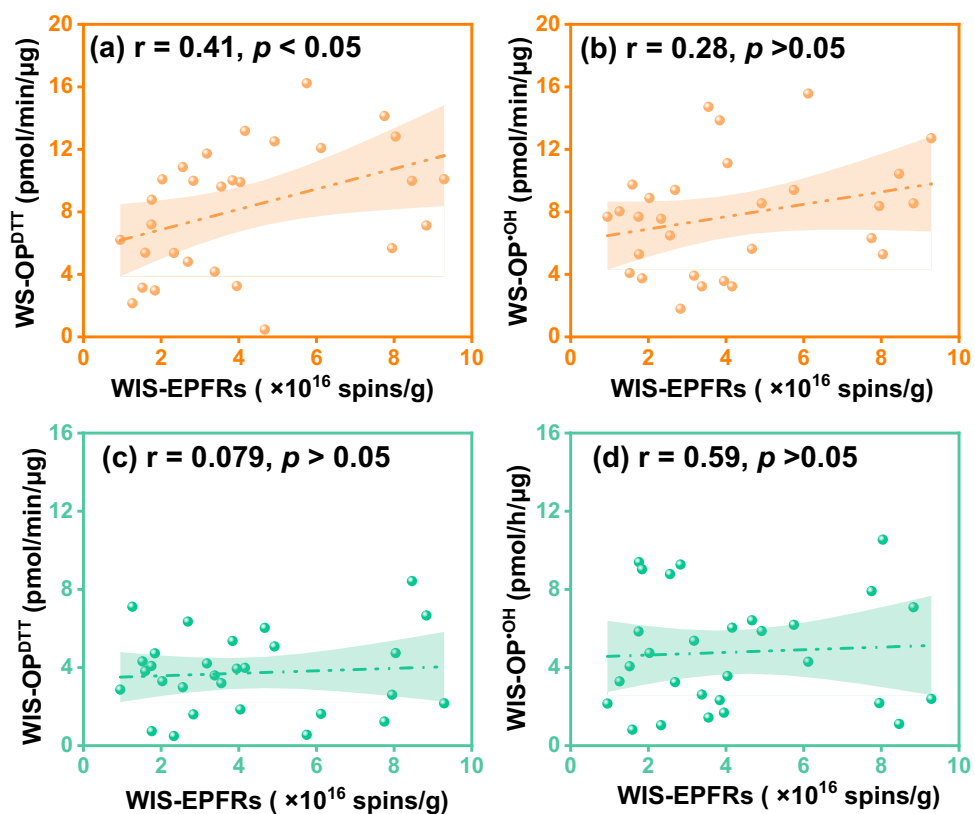

**Figure S9.** Correlations between WIS-EPFRs and OP; (a-b) WIS-EPFRs with OP<sub>WS</sub>; (c-d) WIS-EPFRs with OP<sub>WIS</sub>. The Pearson correlation coefficients ( $r$ ) and associated  $p$  values are illustrated in the figure. The lines and shadow areas are linear regressions with their 95% confidence intervals.

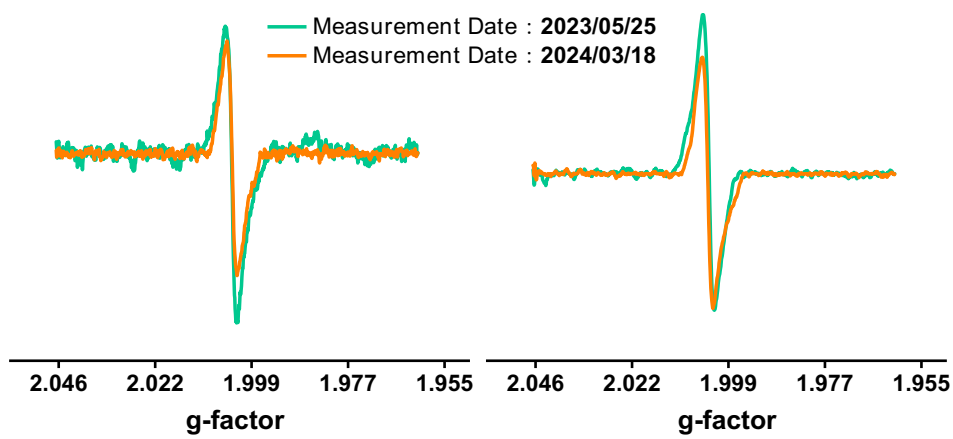

**Figure S10.** EPR spectra of two randomly selected PM<sub>2.5</sub> samples were measured on 25 May 2023 and 18 March 2024, showing the stability of the EPFRs.

**Table S1.** Detailed information on the number of different size PM samples in each season

| Season | Particle size     | Number |
|--------|-------------------|--------|
| Spring | PM <sub>2.5</sub> | 7      |
|        | PM <sub>10</sub>  | 8      |
|        | TSP               | 8      |
| Summer | PM <sub>2.5</sub> | 8      |
|        | PM <sub>10</sub>  | 9      |
|        | TSP               | 9      |
| Autumn | PM <sub>2.5</sub> | 8      |
|        | PM <sub>10</sub>  | 9      |
|        | TSP               | 9      |
| Winter | PM <sub>2.5</sub> | 6      |
|        | PM <sub>10</sub>  | 7      |
|        | TSP               | 7      |

**Table S2.** Comparison of EPFRs in this work and the literature

| Location         | Type  | Site type                        | Sampling period          | PM size               | EPFRm (spins/g)                | EPFRv (spins/m <sup>3</sup> )  | References         |
|------------------|-------|----------------------------------|--------------------------|-----------------------|--------------------------------|--------------------------------|--------------------|
| Quzhou, China    | Rural | Villager                         | 2022.04 - 2023.03        | PM <sub>2.5</sub>     | $6.48 \pm 3.53 \times 10^{16}$ | $5.55 \pm 1.05 \times 10^{12}$ | This study         |
|                  |       |                                  |                          | PM <sub>10</sub>      | $3.91 \pm 2.13 \times 10^{16}$ | $5.83 \pm 1.04 \times 10^{12}$ |                    |
|                  |       |                                  |                          | TSP                   | $2.96 \pm 1.68 \times 10^{16}$ | $5.85 \pm 1.07 \times 10^{12}$ |                    |
| Harbin, China    | Urban | Residential, traffic, commercial | Non-heating season, 2020 | Different size        |                                | $4.58 \times 10^{12}$          | Jia et al. (2023)  |
|                  |       |                                  | Heating season, 2020     |                       |                                | $1.75 \times 10^{14}$          |                    |
| Chongqing, China | Urban | Residential, traffic             | Spring, 2017             | PM <sub>2.5</sub>     | $2.83 \times 10^{18}$          | $6.5 \times 10^{13}$           | Qian et al. (2020) |
|                  |       |                                  | Summer, 2017             |                       | $3.54 \times 10^{18}$          | $4.8 \times 10^{13}$           |                    |
|                  |       |                                  | Autumn, 2017             |                       | $2.50 \times 10^{18}$          | $8.4 \times 10^{13}$           |                    |
|                  |       |                                  | Winter, 2017             |                       | $1.90 \times 10^{18}$          | $8.1 \times 10^{13}$           |                    |
| Nanjing, China   | Urban | Residential, commercial          | 2019.03 - 2019.05        | PM <sub>2.5</sub>     | $1.16 - 10.8 \times 10^{16}$   | $7.61 \times 10^{12}$          | Guo et al. (2020)  |
| Xi'an, China     | Urban | Residential                      | Spring, 2017             | PM <sub>2.5</sub>     | $3.71 \times 10^{15}$          | $1.65 \times 10^{14}$          | Wang et al. (2019) |
|                  |       |                                  | Summer, 2017             |                       | $3.19 \times 10^{15}$          | $9.52 \times 10^{13}$          |                    |
|                  |       |                                  | Autumn, 2017             |                       | $1.92 \times 10^{15}$          | $1.04 \times 10^{14}$          |                    |
|                  |       |                                  | Winter, 2017             |                       | $1.84 \times 10^{15}$          | $1.79 \times 10^{14}$          |                    |
| Yuncheng, China  | Urban | Residential                      | Non-heating season, 2020 | PM <sub>2.5</sub>     |                                | $12.7 \times 10^{12}$          | Ai et al. (2023)   |
|                  |       |                                  | Heating season, 2020     |                       |                                | $28.2 \times 10^{12}$          |                    |
| Beijing, China   | Urban | Residential                      | Non-heating season, 2020 | PM <sub>2.5</sub>     |                                | $16.2 \times 10^{12}$          | Ai et al. (2023)   |
|                  |       |                                  | Heating season, 2020     |                       |                                | $14.2 \times 10^{12}$          |                    |
| Beijing, China   | Urban | Residential                      | 2016.11-2016.12          | TSP                   | $0.31 - 6.2 \times 10^{20}$    | $1.6 - 4.5 \times 10^{16}$     | Yang et al. (2017) |
|                  |       |                                  |                          | PM <sub>&lt;1</sub>   | $0.74 - 3.9 \times 10^{20}$    | $2.7 - 3.5 \times 10^{16}$     |                    |
|                  |       |                                  |                          | PM <sub>1.0-2.5</sub> | $0.47 - 6.5 \times 10^{20}$    | $0.29 - 1.4 \times 10^{16}$    |                    |



|                     |          |                                            |                   |                      |                              |                             |                                 |
|---------------------|----------|--------------------------------------------|-------------------|----------------------|------------------------------|-----------------------------|---------------------------------|
|                     |          |                                            |                   | PM <sub>2.5-10</sub> | ND - $8.2 \times 10^{19}$    | $0.51 - 2.2 \times 10^{15}$ |                                 |
| Lahore,<br>Pakistan | Urban    | Residential                                | Summer, 2019      | PM <sub>2.5</sub>    | $2.3 \times 10^{17}$         | $1.7 \times 10^{13}$        | Ahmad et al. (2023)             |
|                     |          |                                            | Winter, 2019      |                      | $1.1 \times 10^{17}$         | $1.2 \times 10^{14}$        |                                 |
| Louisiana,<br>US    | Urban    |                                            | 2008.10 - 2011.10 | PM <sub>2.5</sub>    | $0.20 - 34.8 \times 10^{17}$ |                             | Gehling and<br>Dellinger (2013) |
| Saudi,<br>Arabia    | Urban    | Industrial,<br>residential,<br>and traffic | 2011.10-2012.06   | PM <sub>2.5</sub>    | $1.6 - 5.8 \times 10^{16}$   |                             | Shaltout et al. (2015)          |
| US                  | Urban    | Five sites                                 |                   | PM <sub>2.5</sub>    | $0.13 - 1.5 \times 10^{17}$  |                             | Squadrito et al.<br>(2001)      |
| Mainz,<br>German    | Suburban | Residential                                | 2015.05-2015.07   | Different<br>size    | $0.68 - 69.5 \times 10^{16}$ |                             | Arangio et al. (2016)           |

**Table S3.** The oxidative potential (OP) of PM determined by DTT assay in this work and the literature

| Location         | Type  | Site type                 | Sampling period   | PM size           | Determined OP type | OP <sub>v</sub> (nmol/min/m <sup>3</sup> ) | OP <sub>m</sub> (pmol/min/μg) | References                  |
|------------------|-------|---------------------------|-------------------|-------------------|--------------------|--------------------------------------------|-------------------------------|-----------------------------|
| Quzhou, China    | Rural |                           | 2022.04 - 2023.03 | PM <sub>2.5</sub> | Total              | 1.35 ± 0.74                                | 12.23 ± 3.18                  | This study                  |
|                  |       |                           |                   |                   | Water-soluble      | 0.87 ± 0.51                                | 8.51 ± 4.01                   |                             |
|                  |       |                           |                   | PM <sub>10</sub>  | Total              | 2.78 ± 1.56                                | 14.82 ± 3.78                  |                             |
|                  |       |                           |                   |                   | Water-soluble      | 1.78 ± 0.97                                | 10.14 ± 4.38                  |                             |
|                  |       |                           |                   | TSP               | Total              | 3.10 ± 1.84                                | 12.22 ± 3.60                  |                             |
|                  |       |                           |                   |                   | Water-soluble      | 2.01 ± 1.07                                | 8.44 ± 3.60                   |                             |
| Jinzhou, China   | Urban | Educational               | 2015.05 - 2016.04 | PM <sub>2.5</sub> | Water-soluble      | 4.4 ± 2.6                                  | 35 ± 18                       | Liu et al. (2018)           |
| Tianjin, China   | Urban | Commercial                |                   |                   |                    | 6.8 ± 3.4                                  | 49 ± 16                       |                             |
| Yantai, China    | Urban | Residential and districts |                   |                   |                    | 4.2 ± 2.7                                  | 30 ± 16                       |                             |
| Beijing, China   | Urban | Educational               | 2015.05 - 2016.04 | PM <sub>2.5</sub> | Water-soluble      | 12.26 ± 6.82                               | 130 ± 100                     | Lu et al. (2014)            |
| Nanjing, China   | Urban | Residential and plants    | 2016.03 - 2016.12 | PM <sub>2.5</sub> | Water-soluble      | 1.16                                       | 20                            | Ma et al. (2021)            |
| Shanghai, China  | Urban | Educational               | Haze periods,     | Different size    | Water-soluble      | 0.19                                       | 62.3                          | Lyu et al. (2018)           |
|                  |       |                           | Nonaze periods,   |                   |                    | 0.78                                       | 42.3                          |                             |
| Xi'an, China     | Urban | Residential               | Spring, 2017      | PM <sub>2.5</sub> | Water-soluble      | 0.53                                       | 11.72                         | Wang et al. (2020b)         |
|                  |       |                           | Summer, 2017      |                   |                    | 0.50                                       | 15.67                         |                             |
|                  |       |                           | Autumn, 2017      |                   |                    | 0.40                                       | 6.94                          |                             |
|                  |       |                           | Winter, 2017      |                   |                    | 0.67                                       | 6.89                          |                             |
| Guangzhou, China | Urban | Educational               | 2017.12 - 2018.01 | PM <sub>2.5</sub> | Water-soluble      | 4.67 ± 1.06                                | 13.47 ± 3.86                  | Zhang Man-Man et al. (2019) |
|                  |       |                           | 2018.04 - 2018.05 |                   |                    | 4.45 ± 1.02                                | 14.66 ± 4.49                  |                             |

|                      |       |             |                   |                   |               |             |              |                             |
|----------------------|-------|-------------|-------------------|-------------------|---------------|-------------|--------------|-----------------------------|
| Lecce,<br>Italy      | Urban |             | 2013 - 2016       | PM <sub>2.5</sub> | Water-soluble | 0.29        | 10.3         | Chirizzi et al.<br>(2017)   |
|                      |       |             |                   | PM <sub>10</sub>  |               | 0.36        | 13.0         |                             |
| Atlanta,<br>US       | Urban | Educational | 2016.07 - 2016.08 | PM <sub>2.5</sub> | Water-soluble | 0.20 ± 0.04 |              | Gao et al. (2017)           |
|                      |       | roadside    |                   |                   | Total         | 0.32 ± 0.06 |              |                             |
|                      |       |             |                   |                   | Water-soluble | 0.21 ± 0.03 |              |                             |
|                      |       |             |                   |                   | Total         | 0.34 ± 0.05 |              |                             |
| Delhi,<br>India      | Urban |             | 2015.05 - 2016.06 | PM <sub>2.5</sub> | Total         | 5.23 ± 4.6  | 29.4 ± 18.48 | Puthussery et al.<br>(2020) |
| Bangkok,<br>Thailand | Urban | Educational | 2016.01 - 2017.01 | TSP               | Water-soluble | 2.23 ± 0.61 | 48.1 ± 20.8  | Wang et al.<br>(2020a)      |
| Elche,<br>Spain      | Urban |             | Winter, 2021      | PM <sub>10</sub>  | Water-soluble | 0.40 ± 0.18 | 18 ± 8       | Clemente et al.<br>(2023)   |
|                      |       |             | Summer, 2021      |                   |               | 0.28 ± 0.09 | 11 ± 4       |                             |

**Table S4.** The oxidative potential (OP) of PM determined by •OH production assay in this work and the literature

| Location         | Type             | Sampling period      | PM size           | Determined OP type | OP <sub>v</sub> (pmol/min/m <sup>3</sup> ) | OP <sub>m</sub> (pmol/h/μg) | References          |
|------------------|------------------|----------------------|-------------------|--------------------|--------------------------------------------|-----------------------------|---------------------|
| Quzhou, China    | Rural            | 2022.04 - 2023.03    | PM <sub>2.5</sub> | Total              | 24.3 ± 13.4                                | 12.5 ± 3.36                 | This study          |
|                  |                  |                      |                   | Water-soluble      | 15.1 ± 10.5                                | 7.76 ± 3.59                 |                     |
|                  |                  |                      | PM <sub>10</sub>  | Total              | 53.5 ± 34.9                                | 16.0 ± 4.15                 |                     |
|                  |                  |                      |                   | Water-soluble      | 25.2 ± 16.7                                | 8.17 ± 3.64                 |                     |
|                  |                  |                      | TSP               | Total              | 61.5 ± 37.9                                | 14.2 ± 4.06                 |                     |
|                  |                  |                      |                   | Water-soluble      | 28.8 ± 16.4                                | 7.30 ± 2.94                 |                     |
| Beijing, China   | Urban            | 2014.06 - 2014.07    | PM <sub>2.5</sub> | Water-soluble      | 24.67                                      | 28.8                        | Li et al. (2019)    |
| Wangdu, China    | Suburban         |                      | PM <sub>2.5</sub> | Water-soluble      | 35.93                                      | 30.58                       |                     |
| Lahore, Pakistan | Urban            | Winter, 2019         | PM <sub>2.5</sub> | Water-soluble      | 52.9                                       | 6.08                        | Ahmad et al. (2023) |
|                  |                  | Summer, 2019         |                   |                    | 33.9                                       | 12.52                       |                     |
| Fairbanks, US    | Residential area | 2022.01 - 2022.02    | PM <sub>2.5</sub> | Total              | 1.40                                       | 7.14                        | Yang et al. (2024)  |
| California, US   | Several regions  | Summer, 2019         | PM <sub>2.5</sub> | Total              | 3.9 ± 1.3                                  | 28.8 ± 6.0                  | Shen et al. (2022)  |
|                  |                  | Winter, 2020         |                   |                    | 6.0 ± 2.2                                  | 37.8 ± 7.8                  |                     |
| Delhi, Indian    | Educational      | 2022.9.1 - 2022.9.22 | PM <sub>2.5</sub> | Total              | 6.38 ± 0.67                                | 17.0 ± 3.7                  | Li et al. (2024)    |

**Table S5.** Pearson correlation coefficients for the linear regression analysis between Total-OP and mass fraction of PM species in different PM sizes

|       | OP <sup>DTTm</sup> |                   |                  |         | OP <sup>OHm</sup> |                   |                  |         |
|-------|--------------------|-------------------|------------------|---------|-------------------|-------------------|------------------|---------|
|       | Total Size         | PM <sub>2.5</sub> | PM <sub>10</sub> | TSP     | Total Size        | PM <sub>2.5</sub> | PM <sub>10</sub> | TSP     |
| OC    | 0.510**            | 0.701**           | 0.390*           | 0.421*  | 0.316**           | 0.492**           | 0.189            | 0.447** |
| EC    | 0.551**            | 0.737**           | 0.527**          | 0.453** | 0.234*            | 0.515**           | 0.084            | 0.419*  |
| EPFRm | 0.297**            | 0.557**           | 0.325            | 0.024   | 0.001             | 0.480**           | -0.021           | -0.192  |
| Li    | 0.062              | 0.353             | -0.247           | 0.159   | 0.06              | 0.306             | -0.312           | 0.282   |
| Mg    | 0.225              | 0.471*            | 0.36             | -0.069  | -0.073            | 0.359             | -0.147           | -0.301  |
| Al    | 0.187              | 0.338             | 0.193            | 0.028   | 0.075             | 0.324             | 0.001            | 0.165   |
| Si    | 0.233*             | 0.438*            | 0.297            | -0.017  | -0.063            | 0.384*            | -0.029           | -0.342  |
| K     | 0.159              | 0.285             | 0.251            | -0.043  | -0.065            | 0.24              | 0.155            | -0.326  |
| Ca    | 0.199              | 0.289             | 0.335            | -0.029  | -0.01             | 0.351             | -0.005           | -0.322  |
| Cr    | 0.300**            | 0.539**           | 0.146            | 0.226   | 0.061             | 0.369             | 0.071            | -0.054  |
| Mn    | 0.199              | 0.412*            | -0.025           | 0.165   | 0.044             | 0.348             | -0.364*          | 0.285   |
| Fe    | 0.380**            | 0.618**           | 0.370*           | 0.181   | 0.083             | 0.474**           | -0.008           | 0.380*  |
| Cu    | 0.113              | 0.354             | -0.047           | 0.174   | 0.108             | 0.545*            | -0.179           | 0.397*  |
| Zn    | 0.307**            | 0.381*            | 0.319            | 0.520** | 0.104             | 0.374*            | -0.079           | 0.11    |
| Pb    | 0.317**            | 0.389*            | 0.25             | 0.295   | 0.297**           | 0.530**           | -0.037           | 0.380*  |

\* and \*\* indicate significant correlation at 0.05 and 0.01 level (two-tailed), respectively.

**Table S6.** Pearson correlation coefficients for the linear regression analysis between WS-OP and mass fraction of PM species in different PM sizes

|       | OP <sup>DTTm</sup> |                   |                  |         | OP <sup>OHm</sup> |                   |                  |        |
|-------|--------------------|-------------------|------------------|---------|-------------------|-------------------|------------------|--------|
|       | Total Size         | PM <sub>2.5</sub> | PM <sub>10</sub> | TSP     | Total Size        | PM <sub>2.5</sub> | PM <sub>10</sub> | TSP    |
| OC    | 0.343**            | 0.526**           | 0.205            | 0.283   | 0.281**           | 0.508**           | 0.041            | 0.166  |
| EC    | 0.449**            | 0.625**           | 0.397*           | 0.420*  | 0.405**           | 0.444*            | 0.388*           | 0.406* |
| EPFRm | 0.320**            | 0.550**           | 0.387*           | 0.204   | 0.329**           | 0.428*            | 0.355*           | 0.249  |
| Li    | -0.014             | 0.186             | -0.313           | 0.208   | 0.149             | 0.322             | -0.011           | 0.2    |
| Mg    | 0.302**            | 0.598**           | 0.382            | 0.044   | 0.239*            | 0.19              | 0.400*           | 0.143  |
| Al    | 0.249*             | 0.427*            | 0.269            | 0.158   | 0.216*            | 0.253             | 0.235            | 0.215  |
| Si    | 0.288**            | 0.524**           | 0.381*           | 0.144   | 0.267**           | 0.297             | 0.428*           | 0.119  |
| K     | 0.213*             | 0.373*            | 0.306            | 0.119   | 0.213*            | 0.26              | 0.348*           | -0.005 |
| Ca    | 0.263*             | 0.429*            | 0.371*           | 0.047   | 0.260*            | 0.263             | 0.416*           | 0.141  |
| Cr    | 0.300**            | 0.535**           | 0.207            | 0.304   | 0.165             | 0.114             | 0.201            | 0.288  |
| Mn    | 0.189              | 0.343             | 0.036            | 0.178   | 0.14              | 0.2               | 0.026            | 0.265  |
| Fe    | 0.423**            | 0.633**           | 0.430*           | 0.333   | 0.275**           | 0.386*            | 0.235            | 0.152  |
| Cu    | 0.106              | 0.223             | -0.007           | 0.252   | 0.148             | 0.621**           | -0.19            | 0.237  |
| Zn    | 0.335**            | 0.442*            | 0.408*           | 0.526** | 0.183             | 0.168             | 0.288            | 0.311  |
| Pb    | 0.325**            | 0.303             | 0.255            | 0.411*  | 0.285**           | 0.499**           | 0.063            | 0.256  |

\* and \*\* indicate significant correlation at 0.05 and 0.01 level (two-tailed), respectively.

**Table S7.** Pearson correlation coefficients for the linear regression analysis between WIS-OP and mass fraction of PM species in different PM sizes

|       | OP <sup>DTTm</sup> |                   |                  |        | OP <sup>OHm</sup> |                   |                  |         |
|-------|--------------------|-------------------|------------------|--------|-------------------|-------------------|------------------|---------|
|       | Total Size         | PM <sub>2.5</sub> | PM <sub>10</sub> | TSP    | Total Size        | PM <sub>2.5</sub> | PM <sub>10</sub> | TSP     |
| OC    | 0.203*             | 0.434**           | 0.256            | 0.18   | 0.08              | -0.054            | 0.145            | 0.28    |
| EC    | 0.068              | -0.014            | 0.113            | 0.043  | -0.099            | 0.057             | -0.242           | 0.107   |
| EPFRm | -0.124             | -0.213            | -0.208           | -0.235 | -0.263*           | 0.035             | -0.314           | -0.319  |
| Li    | 0.101              | 0.185             | 0.214            | 0.093  | -0.062            | -0.041            | -0.289           | 0.118   |
| Mg    | -0.181             | -0.415            | -0.159           | -0.137 | -0.263*           | 0.214             | -0.474*          | -0.358  |
| Al    | -0.148             | -0.288            | -0.202           | -0.242 | -0.099            | 0.072             | -0.194           | 0.008   |
| Si    | -0.17              | -0.35             | -0.243           | -0.21  | -0.275**          | 0.086             | -0.382*          | -0.367* |
| K     | -0.125             | -0.291            | -0.175           | -0.233 | -0.233*           | -0.042            | -0.143           | -0.276  |
| Ca    | -0.165             | -0.394            | -0.162           | -0.257 | -0.219*           | 0.09              | -0.349*          | -0.364* |
| Cr    | -0.065             | -0.211            | -0.162           | -0.101 | -0.073            | 0.303             | -0.103           | -0.225  |
| Mn    | -0.028             | -0.03             | -0.113           | -0.016 | -0.068            | 0.181             | -0.372*          | 0.082   |
| Fe    | -0.156             | -0.282            | -0.217           | -0.199 | -0.14             | 0.081             | -0.203           | -0.054  |
| Cu    | -0.004             | 0.081             | -0.067           | -0.11  | -0.014            | -0.167            | -0.011           | 0.178   |
| Zn    | -0.12              | -0.275            | -0.265           | -0.008 | -0.046            | 0.24              | -0.321           | -0.098  |
| Pb    | -0.052             | 0.01              | -0.076           | -0.151 | 0.059             | 0.004             | -0.087           | -0.358  |

\* and \*\* indicate significant correlation at 0.05 and 0.01 level (two-tailed), respectively.

**Table S8.** EPFRs concentrations (spins/m<sup>3</sup>) in original and washed samples and proportion of water-soluble fraction

| Date       | Particle size     | Original samples | Washed samples | Water soluble fraction (%) |
|------------|-------------------|------------------|----------------|----------------------------|
| 2022/04/08 | PM <sub>2.5</sub> | 5.73E+12         | 3.67E+12       | 36.0                       |
| 2022/04/15 | PM <sub>2.5</sub> | 7.43E+12         | 5.28E+12       | 28.9                       |
| 2022/04/23 | PM <sub>2.5</sub> | 6.22E+12         | 4.15E+12       | 33.3                       |
| 2022/05/18 | PM <sub>2.5</sub> | 1.13E+12         | 5.17E+11       | 54.1                       |
| 2022/06/02 | PM <sub>2.5</sub> | 6.11E+12         | 3.76E+12       | 38.5                       |
| 2022/06/15 | PM <sub>2.5</sub> | 6.19E+12         | 2.07E+12       | 66.6                       |
| 2022/06/23 | PM <sub>2.5</sub> | 4.46E+12         | 3.39E+12       | 23.9                       |
| 2022/07/2  | PM <sub>2.5</sub> | 1.02E+12         | 7.30E+11       | 28.2                       |
| 2022/07/17 | PM <sub>2.5</sub> | 5.16E+12         | 2.91E+12       | 43.6                       |
| 2022/07/23 | PM <sub>2.5</sub> | 2.06E+12         | 1.11E+12       | 45.8                       |
| 2022/08/1  | PM <sub>2.5</sub> | 2.59E+12         | 1.44E+12       | 44.3                       |
| 2022/08/22 | PM <sub>2.5</sub> | 3.15E+12         | 2.34E+12       | 25.7                       |
| 2022/09/01 | PM <sub>2.5</sub> | 3.49E+12         | 2.61E+12       | 25.1                       |
| 2022/09/16 | PM <sub>2.5</sub> | 6.12E+12         | 3.46E+12       | 43.5                       |
| 2022/09/22 | PM <sub>2.5</sub> | 4.14E+12         | 3.73E+12       | 9.9                        |
| 2022/10/04 | PM <sub>2.5</sub> | 9.85E+11         | 6.17E+11       | 37.3                       |
| 2022/10/12 | PM <sub>2.5</sub> | 1.77E+12         | 1.33E+12       | 25.0                       |
| 2022/10/21 | PM <sub>2.5</sub> | 1.86E+12         | 1.23E+12       | 33.7                       |
| 2022/11/03 | PM <sub>2.5</sub> | 7.37E+11         | 6.14E+11       | 16.7                       |
| 2022/11/12 | PM <sub>2.5</sub> | 7.81E+12         | 6.77E+12       | 13.3                       |
| 2022/12/07 | PM <sub>2.5</sub> | 4.64E+12         | 3.32E+12       | 28.4                       |
| 2022/12/25 | PM <sub>2.5</sub> | 3.95E+12         | 1.86E+12       | 52.9                       |
| 2023/01/02 | PM <sub>2.5</sub> | 7.46E+12         | 3.34E+12       | 55.2                       |
| 2023/01/25 | PM <sub>2.5</sub> | 9.41E+12         | 6.21E+12       | 34.0                       |
| 2023/02/15 | PM <sub>2.5</sub> | 7.73E+12         | 4.36E+12       | 43.6                       |
| 2023/02/25 | PM <sub>2.5</sub> | 8.64E+11         | 8.16E+11       | 5.6                        |
| 2023/03/5  | PM <sub>2.5</sub> | 1.17E+12         | 8.05E+11       | 31.5                       |
| 2023/03/12 | PM <sub>2.5</sub> | 1.71E+12         | 1.30E+12       | 24.4                       |
| 2023/03/27 | PM <sub>2.5</sub> | 3.04E+12         | 2.37E+12       | 21.9                       |
| 2022/04/24 | PM <sub>10</sub>  | 5.62E+12         | 4.35E+12       | 22.6                       |
| 2023/03/13 | PM <sub>10</sub>  | 1.82E+12         | 1.06E+12       | 41.5                       |
| 2022/04/17 | TSP               | 1.00E+12         | 5.69E+11       | 43.2                       |
| 2023/03/29 | TSP               | 1.37E+12         | 5.66E+11       | 58.8                       |
| 2022/06/03 | PM <sub>10</sub>  | 1.39E+12         | 9.78E+11       | 29.7                       |
| 2022/07/18 | PM <sub>10</sub>  | 4.99E+12         | 3.22E+12       | 35.4                       |
| 2022/06/04 | TSP               | 1.45E+12         | 8.63E+11       | 40.5                       |
| 2022/06/18 | TSP               | 9.73E+12         | 8.05E+12       | 17.2                       |
| 2022/10/22 | PM <sub>10</sub>  | 1.27E+12         | 9.55E+11       | 24.5                       |
| 2022/11/27 | PM <sub>10</sub>  | 2.06E+12         | 1.42E+12       | 31.4                       |



|            |                  |          |          |      |
|------------|------------------|----------|----------|------|
| 2022/10/06 | TSP              | 4.73E+12 | 2.68E+12 | 43.4 |
| 2022/10/24 | TSP              | 1.78E+12 | 1.10E+12 | 38.2 |
| 2023/01/26 | PM <sub>10</sub> | 2.25E+12 | 1.60E+12 | 28.9 |
| 2023/02/06 | PM <sub>10</sub> | 1.65E+12 | 8.60E+11 | 47.9 |
| 2022/12/27 | TSP              | 2.40E+12 | 1.07E+12 | 55.4 |
| 2023/02/07 | TSP              | 4.68E+12 | 2.64E+12 | 43.6 |
| Average    |                  |          |          | 35.2 |

**Table S9.** EPFRs concentrations (spins/m<sup>3</sup>) in original and acidified samples and proportion of acid-reduced fraction

| Date       | Particle size     | Original samples | Acidified samples | Acid-reduced fraction (%) |
|------------|-------------------|------------------|-------------------|---------------------------|
| 2022/04/08 | PM <sub>2.5</sub> | 3.99E+12         | 1.74E+12          | 56.5                      |
| 2022/07/23 | PM <sub>2.5</sub> | 1.51E+12         | 6.21E+11          | 58.8                      |
| 2022/08/22 | PM <sub>2.5</sub> | 3.16E+12         | 9.65E+11          | 69.4                      |
| 2022/07/17 | PM <sub>2.5</sub> | 2.28E+12         | 1.03E+12          | 54.5                      |
| 2023/03/05 | PM <sub>2.5</sub> | 4.49E+12         | ND                | 100                       |
| 2023/03/12 | PM <sub>2.5</sub> | 1.86E+12         | 4.08E+11          | 78.1                      |
| Average    |                   |                  |                   | 69.6                      |

**Table S10.** Pearson correlation coefficients between EPFRm and mass fraction of PM species

|    | Total Size | PM <sub>2.5</sub> | PM <sub>10</sub> | TSP     |
|----|------------|-------------------|------------------|---------|
| OC | 0.463**    | 0.694**           | 0.133            | 0.023   |
| EC | 0.630**    | 0.784**           | 0.284            | 0.286   |
| Li | 0.114      | 0.249             | 0.132            | 0.091   |
| Mg | 0.705**    | 0.658**           | 0.569**          | 0.593** |
| Al | 0.575**    | 0.490**           | 0.741**          | 0.420*  |
| Si | 0.919**    | 0.876**           | 0.936**          | 0.894** |
| K  | 0.774**    | 0.809**           | 0.680**          | 0.308   |
| Ca | 0.623**    | 0.560**           | 0.614**          | 0.362*  |
| V  | 0.843**    | 0.821**           | 0.742**          | 0.804** |
| Cr | 0.793**    | 0.781**           | 0.681**          | 0.693** |
| Mn | 0.348**    | 0.405*            | 0.357*           | 0.078   |
| Fe | 0.880**    | 0.951**           | 0.814**          | 0.693** |
| Cu | 0.101      | 0.269             | -0.049           | -0.369* |
| Zn | 0.536**    | 0.489**           | 0.778**          | 0.472** |
| Cd | 0.362**    | 0.532**           | 0.524**          | 0.32    |
| Pb | 0.187      | 0.411*            | 0.117            | 0.097   |

\* and \*\* indicate significant correlation at 0.05 and 0.01 level (two-tailed), respectively.

## References

- Ahmad, M., Chen, J., Yu, Q., Tariq Khan, M., Weqas Ali, S., Nawab, A., Phairuang, W., and Panyametheekul, S.: Characteristics and Risk Assessment of Environmentally Persistent Free Radicals (EPFRs) of PM<sub>2.5</sub> in Lahore, Pakistan, *International journal of environmental research and public health*, 20, 2384, <https://doi.org/10.3390/ijerph20032384>, 2023.
- Ai, J., Qin, W. H., Chen, J., Sun, Y. W., Yu, Q., Xin, K., Huang, H. Y., Zhang, L. Y., Ahmad, M., and Liu, X. A.: Pollution characteristics and light-driven evolution of environmentally persistent free radicals in PM<sub>2.5</sub> in two typical northern cities of China, *Journal of Hazardous Materials*, 454, 131466, <https://doi.org/10.1016/j.jhazmat.2023.131466>, 2023.
- Arangio, A. M., Tong, H. J., Socorro, J., Pöschl, U., and Shiraiwa, M.: Quantification of environmentally persistent free radicals and reactive oxygen species in atmospheric aerosol particles, *Atmospheric Chemistry and Physics*, 16, 13105-13119, <https://doi.org/10.5194/acp-16-13105-2016>, 2016.
- Chirizzi, D., Cesari, D., Guascito, M. R., Dinoi, A., Giotta, L., Donateo, A., and Contini, D.: Influence of Saharan dust outbreaks and carbon content on oxidative potential of water-soluble fractions of PM<sub>2.5</sub> and PM<sub>10</sub>, *Atmospheric Environment*, 163, 1-8, <https://doi.org/10.1016/j.atmosenv.2017.05.021>, 2017.
- Clemente, A., Gil-Moltó, J., Yubero, E., Juárez, N., Nicolás, J. F., Crespo, J., and Galindo, N.: Sensitivity of PM<sub>10</sub> oxidative potential to aerosol chemical composition at a Mediterranean urban site: ascorbic acid versus dithiothreitol measurements, *Air Qual. Atmos. Health*, 16, 1165-1172, <https://doi.org/10.1007/s11869-023-01332-1>, 2023.
- Fang, T., Verma, V., Guo, H., King, L. E., and Edgerton, E. S.: A semi-automated system for quantifying the oxidative potential of ambient particles in aqueous extracts using the dithiothreitol (DTT) assay: results from the Southeastern Center for Air Pollution and Epidemiology (SCAPE), *Atmos. Meas. Tech.*, 8, 471-482, <https://doi.org/10.5194/amt-8-471-2015>, 2015.
- Gao, D., Fang, T., Verma, V., Zeng, L. G., and Weber, R. J.: A method for measuring total aerosol oxidative potential (OP) with the dithiothreitol (DTT) assay and comparisons between an urban and roadside site of water-soluble and total OP, *Atmos. Meas. Tech.*, 10, 2821-2835, <https://doi.org/10.5194/amt-10-2821-2017>, 2017.
- Gehling, W. and Dellinger, B.: Environmentally Persistent Free Radicals and Their Lifetimes in PM<sub>2.5</sub>, *Environmental Science & Technology*, 47, 8172-8178, <https://doi.org/10.1021/es401767m>, 2013.
- Guo, X. W., Zhang, N., Hu, X., Huang, Y., Ding, Z. H., Chen, Y. J., and Lian, H. Z.: Characteristics and potential inhalation exposure risks of PM<sub>2.5</sub>-bound environmental persistent free radicals in Nanjing, a mega-city in China, *Atmospheric Environment*, 224, 117355, <https://doi.org/10.1016/j.atmosenv.2020.117355>, 2020.
- Jia, S.-M., Wang, D.-Q., Liu, L.-Y., Zhang, Z.-F., and Ma, W.-L.: Size-resolved environmentally persistent free radicals in cold region atmosphere: Implications for inhalation exposure risk, *Journal of Hazardous Materials*, 443, 130263, <https://doi.org/10.1016/j.jhazmat.2022.130263>, 2023.
- Li, C., Hakkim, H., Sinha, V., Sinha, B., Pardo, M., Cai, D., Reicher, N., Chen, J., Hao, K., and Rudich, Y.: Variation of PM<sub>2.5</sub> Redox Potential and Toxicity During Monsoon in Delhi, India, *ACS ES&T Air*, 1, 316-329, 2024.
- Li, X. Y., Kuang, X. B. M., Yan, C. Q., Ma, S. X., Paulson, S. E., Zhu, T., Zhang, Y. H., and Zheng, M.: Oxidative Potential by PM<sub>2.5</sub> in the North China Plain: Generation of Hydroxyl Radical, *Environmental Science & Technology*, 53, 512-520, <https://doi.org/10.1021/acs.est.8b05253>, 2019.
- Liu, W. J., Xu, Y. S., Liu, W. X., Liu, Q. Y., Yu, S. Y., Liu, Y., Wang, X., and Tao, S.: Oxidative potential of ambient PM<sub>2.5</sub> in the coastal cities of the Bohai Sea, northern China: Seasonal variation and source apportionment, *Environmental Pollution*, 236, 514-528, <https://doi.org/10.1016/j.envpol.2018.01.116>, 2018.

Lu, Y., Su, S., Jin, W. J., Wang, B., Li, N., Shen, H. Z., Li, W., Huang, Y., Chen, H., Zhang, Y. Y., Chen, Y. C., Lin, N., Wang, X. L., and Tao, S.: Characteristics and cellular effects of ambient particulate matter from Beijing, *Environmental Pollution*, 191, 63-69, <https://doi.org/10.1016/j.envpol.2014.04.008>, 2014.

Lyu, Y., Guo, H. B., Cheng, T. T., and Li, X.: Particle Size Distributions of Oxidative Potential of Lung-Deposited Particles: Assessing Contributions from Quinones and Water-Soluble Metals, *Environmental Science & Technology*, 52, 6592-6600, <https://doi.org/10.1021/acs.est.7b06686>, 2018.

Ma, X. Y., Nie, D. Y., Chen, M. D., Ge, P. X., Liu, Z. J., Ge, X. L., Li, Z. R., and Gu, R.: The Relative Contributions of Different Chemical Components to the Oxidative Potential of Ambient Fine Particles in Nanjing Area, *International Journal of Environmental Research and Public Health*, 18, <https://doi.org/10.3390/ijerph18062789>, 2021.

Puthussery, J. V., Singh, A., Rai, P., Bhattu, D., Kumar, V., Vats, P., Furger, M., Rastogi, N., Slowik, J. G., Ganguly, D., Prevot, A. S. H., Tripathi, S. N., and Verma, V.: Real-Time Measurements of PM<sub>2.5</sub> Oxidative Potential Using a Dithiothreitol Assay in Delhi, India, *Environmental Science & Technology Letters*, 7, 504-510, <https://doi.org/10.1021/acs.estlett.0c00342>, 2020.

Qian, R. Z., Zhang, S. M., Peng, C., Zhang, L. Y., Yang, F. M., Tian, M., Huang, R. J., Wang, Q. Y., Chen, Q. C., Yao, X. J., and Chen, Y.: Characteristics and potential exposure risks of environmentally persistent free radicals in PM<sub>2.5</sub> in the three gorges reservoir area, Southwestern China, *Chemosphere*, 252, 10, <https://doi.org/10.1016/j.chemosphere.2020.126425>, 2020.

Shaltout, A. A., Boman, J., Shehadeh, Z. F., Al-Malawi, D. A. R., Hemeda, O. M., and Morsy, M. M.: Spectroscopic investigation of PM<sub>2.5</sub> collected at industrial, residential and traffic sites in Taif, Saudi Arabia, *J. Aerosol. Sci.*, 79, 97-108, <https://doi.org/10.1016/j.jaerosci.2014.09.004>, 2015.

Shen, J. Q., Taghvaei, S., La, C., Oroumijeh, F., Liu, J., Jerrett, M., Weichenthal, S., Del Rosario, I., Shafer, M. M., Ritz, B., Zhu, Y. F., and Paulson, S. E.: Aerosol Oxidative Potential in the Greater Los Angeles Area: Source Apportionment and Associations with Socioeconomic Position, *Environmental Science & Technology*, 56, 17795-17804, <https://doi.org/10.1021/acs.est.2c02788>, 2022.

Son, Y., Mishin, V., Welsh, W., Lu, S. E., Laskin, J. D., Kipen, H., and Meng, Q. M.: A Novel High-Throughput Approach to Measure Hydroxyl Radicals Induced by Airborne Particulate Matter, *International Journal of Environmental Research and Public Health*, 12, 13678-13695, <https://doi.org/10.3390/ijerph121113678>, 2015.

Squadrito, G. L., Cueto, R., Dellinger, B., and Pryor, W. A.: Quinoid redox cycling as a mechanism for sustained free radical generation by inhaled airborne particulate matter, *Free Radical Biology and Medicine*, 31, 1132-1138, [https://doi.org/10.1016/s0891-5849\(01\)00703-1](https://doi.org/10.1016/s0891-5849(01)00703-1), 2001.

Wang, J. Q., Jiang, H. Y., Jiang, H. X., Mo, Y. Z., Geng, X. F., Li, J. B., Mao, S. D., Bualert, S., Ma, S. X., Li, J., and Zhang, G.: Source apportionment of water-soluble oxidative potential in ambient total suspended particulate from Bangkok: Biomass burning versus fossil fuel combustion, *Atmospheric Environment*, 235, 117624, <https://doi.org/10.1016/j.atmosenv.2020.117624>, 2020a.

Wang, Y. Q., Li, S. P., Wang, M. M., Sun, H. Y., Mu, Z., Zhang, L. X., Li, Y. G., and Chen, Q. C.: Source apportionment of environmentally persistent free radicals (EPFRs) in PM<sub>2.5</sub> over Xi'an, China, *Science of the Total Environment*, 689, 193-202, <https://doi.org/10.1016/j.scitotenv.2019.06.424>, 2019.

Wang, Y. Q., Wang, M. M., Li, S. P., Sun, H. Y., Mu, Z., Zhang, L. X., Li, Y. G., and Chen, Q. C.: Study on the oxidation potential of the water-soluble components of ambient PM<sub>2.5</sub> over Xi'an, China: Pollution levels, source apportionment and transport pathways, *Environment International*, 136, 11, <https://doi.org/10.1016/j.envint.2020.105515>, 2020b.

Yang, L. L., Liu, G. R., Zheng, M. H., Jin, R., Zhu, Q. Q., Zhao, Y. Y., Wu, X. L., and Xu, Y.: Highly Elevated Levels and Particle-Size Distributions of Environmentally Persistent Free Radicals in Haze-Associated

Atmosphere, Environmental Science & Technology, 51, 7936-7944, <https://doi.org/10.1021/acs.est.7b01929>, 2017.

Yang, Y., Battaglia, M. A., Mohan, M. K., Robinson, E. S., DeCarlo, P. F., Edwards, K. C., Fang, T., Kapur, S., Shiraiwa, M., Cesler-Maloney, M., Simpson, W. R., Campbell, J. R., Nenes, A., Mao, J., and Weber, R. J.: Assessing the Oxidative Potential of Outdoor PM<sub>2.5</sub> in Wintertime Fairbanks, Alaska, ACS ES&T air, 1, 175-187, <https://doi.org/10.1021/acsestair.3c00066>, 2024.

ZHANG Man-man, LI Hui-rong, YANG Wen-da, SUN Jia-yin, and Cheng, W.: Measurement based on DTT method of the PM<sub>2.5</sub> oxidative potential in Guangzhou urban area, China Environmental Science 2019.
